# Supplementary material for: Mixtures of the [TMA][EPPS] ionic liquid with methanol, ethanol, or water: thermophysical properties and molecular interactions
Source: Royal Society of Chemistry journal article supplement (doi:10.1039/d3nj00146f), 2023-01-01
Supplement: d3nj00146f1.pdf [file d3nj00146f1.pdf]

## Supplementary Information

### **Mixtures of [TMA][EPPS] ionic liquid plus methanol, ethanol, or water: Thermophysical properties and molecular interactions**

Asalil Mustain,<sup>1,2</sup> Bhupender S. Gupta,<sup>1</sup> Mohamed Taha\*,<sup>3</sup> Ming-Jer Lee\*,<sup>1</sup>

<sup>1</sup>Department of Chemical Engineering, National Taiwan University of Science and Technology, 43 Keelung Road, Section 4, Taipei 106-07, Taiwan

<sup>2</sup>Department of Chemical Engineering, State Polytechnic of Malang, Jl. Soekarno Hatta No. 9 Malang 65141, Indonesia (current address of AM)

<sup>3</sup>Materials Science and Nanotechnology Department, Faculty of Postgraduate Studies for Advanced Sciences (PSAS), Beni-Suef University, Beni-Suef, Egypt

**Table S1.** Experimental densities  $\rho$  for binary system of [TMA][EPPS] (1) + solvents (2), at unsaturated and saturated conditions, at temperature  $T = 298.15$  K under pressure  $p = 101.3$  kPa<sup>a</sup>

| Water                       |                              | Methanol                    |                              | Ethanol                     |                              |
|-----------------------------|------------------------------|-----------------------------|------------------------------|-----------------------------|------------------------------|
| $m$ (mol.kg <sup>-1</sup> ) | $\rho$ (g.cm <sup>-3</sup> ) | $m$ (mol.kg <sup>-1</sup> ) | $\rho$ (g.cm <sup>-3</sup> ) | $m$ (mol.kg <sup>-1</sup> ) | $\rho$ (g.cm <sup>-3</sup> ) |
| 0.342                       | 1.0138                       | 0.341                       | 0.8192                       | 0.342                       | 0.8157                       |
| 0.768                       | 1.0314                       | 0.768                       | 0.8522                       | 0.768                       | 0.8474                       |
| 1.317                       | 1.0505                       | 1.317                       | 0.8868                       | 1.316                       | 0.8794                       |
| 2.048                       | 1.0708                       | 2.048                       | 0.9222                       | 2.048                       | 0.9144                       |
| 2.993                       | 1.0854                       | 3.042                       | 0.9586                       | 2.370                       | 0.9250                       |
| 3.972                       | 1.0993                       | 3.763                       | 0.9776                       | 2.526                       | 0.9370                       |
| 4.696                       | 1.1083                       | 3.975                       | 0.9810                       | 2.915*                      | 0.9375                       |
| 5.593                       | 1.1152                       | 4.182                       | 0.9876                       | 3.331*                      | 0.9390                       |
| 6.413                       | 1.1216                       | 4.347                       | 0.9890                       | 3.513*                      | 0.9382                       |
| 6.242                       | 1.1197                       | 4.688                       | 0.9970                       |                             |                              |
| 6.989*                      | 1.1244                       | 5.226*                      | 1.0020                       |                             |                              |
| 7.456*                      | 1.1260                       | 5.696*                      | 1.0011                       |                             |                              |
| 8.145*                      | 1.1260                       | 6.179*                      | 1.0030                       |                             |                              |
|                             |                              | 6.313*                      | 1.0004                       |                             |                              |

<sup>a</sup>  $m$  is molality. Combined expanded uncertainties  $U_c$  are  $U_c(T) = 0.2$  K,  $U_c(p) = 4$  kPa,  $U_c(\rho) = 1 \times 10^{-4}$  g·cm<sup>-3</sup> and  $U_c(m) = 0.002$  mol·kg<sup>-1</sup> (level of confidence = 0.95,  $k = 2$ ).

\*Saturated condition

**Table S2.** Solubilities  $S$  and densities at solubility limits  $\rho^*$  for [TMA][EPPS] in solvents at temperature  $T = 298.15$  K under pressure  $p = 101.3$  kPa<sup>a</sup>

| Solvent  | $S$ /mol·kg <sup>-1</sup> | $\rho^*$ /g·cm <sup>-3</sup> |
|----------|---------------------------|------------------------------|
| water    | 6.78                      | 1.1261                       |
| methanol | 4.88                      | 1.0009                       |
| ethanol  | 2.57                      | 0.9389                       |

<sup>a</sup> Combined expanded uncertainties  $U_c$  are  $U_c(T) = 0.2$  K,  $U_c(P) = 4$  kPa and,  $U_c(\rho^*) = 1 \times 10^{-3}$  g·cm<sup>-3</sup> (level of confidence = 0.95,  $k = 2$ ). Relative standard uncertainty  $u_r$  is  $u_r(S) = 0.02$ .

**Table S3.** Experimental viscosities  $\eta$  for binary systems of [TMA][EPPS] (1) + solvents (2) at temperatures  $T = (283.15 \text{ to } 333.15) \text{ K}$  under pressure  $p = 101.3 \text{ kPa}$  <sup>a</sup>

| $T/\text{K}$                   | $\eta/\text{mPa}\cdot\text{s}$             |                                            |                                            |                                            |
|--------------------------------|--------------------------------------------|--------------------------------------------|--------------------------------------------|--------------------------------------------|
|                                | $m = 0.342 \text{ mol}\cdot\text{kg}^{-1}$ | $m = 0.768 \text{ mol}\cdot\text{kg}^{-1}$ | $m = 1.317 \text{ mol}\cdot\text{kg}^{-1}$ | $m = 2.048 \text{ mol}\cdot\text{kg}^{-1}$ |
| [TMA][EPPS] (1) + water (2)    |                                            |                                            |                                            |                                            |
| 283.15                         | 1.79                                       | 2.76                                       | 4.68                                       | 9.34                                       |
| 288.15                         | 1.55                                       | 2.36                                       | 3.94                                       | 7.64                                       |
| 293.15                         | 1.36                                       | 2.04                                       | 3.35                                       | 6.32                                       |
| 298.15                         | 1.20                                       | 1.78                                       | 2.88                                       | 5.31                                       |
| 303.15                         | 1.07                                       | 1.57                                       | 2.50                                       | 4.56                                       |
| 308.15                         | 0.96                                       | 1.39                                       | 2.19                                       | 3.92                                       |
| 313.15                         | 0.86                                       | 1.25                                       | 1.94                                       | 3.40                                       |
| 323.15                         | 0.71                                       | 1.02                                       | 1.55                                       | 2.63                                       |
| 333.15                         | 0.60                                       | 0.85                                       | 1.28                                       | 2.09                                       |
| [TMA][EPPS] (1) + methanol (2) |                                            |                                            |                                            |                                            |
| 283.15                         | 0.94                                       | 1.40                                       | 2.22                                       | 4.19                                       |
| 288.15                         | 0.87                                       | 1.28                                       | 2.01                                       | 3.71                                       |
| 293.15                         | 0.80                                       | 1.17                                       | 1.82                                       | 3.30                                       |
| 298.15                         | 0.74                                       | 1.08                                       | 1.66                                       | 2.95                                       |
| 303.15                         | 0.69                                       | 0.99                                       | 1.51                                       | 2.66                                       |
| 308.15                         | 0.64                                       | 0.92                                       | 1.39                                       | 2.37                                       |
| 313.15                         | 0.60                                       | 0.85                                       | 1.28                                       | 2.16                                       |
| 323.15                         | 0.52                                       | 0.74                                       | 1.09                                       | 1.80                                       |
| 333.15                         | 0.46                                       | 0.64                                       | 0.94                                       | 1.53                                       |
| [TMA][EPPS] (1) + ethanol (2)  |                                            |                                            |                                            |                                            |
| 283.15                         | 2.17                                       | 3.43                                       | 5.85                                       | 11.2                                       |
| 288.15                         | 1.95                                       | 3.04                                       | 5.10                                       | 9.50                                       |
| 293.15                         | 1.76                                       | 2.71                                       | 4.53                                       | 8.14                                       |
| 298.15                         | 1.59                                       | 2.43                                       | 3.99                                       | 7.03                                       |
| 303.15                         | 1.44                                       | 2.18                                       | 3.54                                       | 6.10                                       |
| 308.15                         | 1.31                                       | 1.96                                       | 3.15                                       | 5.34                                       |
| 313.15                         | 1.19                                       | 1.78                                       | 2.82                                       | 4.76                                       |
| 323.15                         | 1.00                                       | 1.46                                       | 2.29                                       | 3.75                                       |
| 333.15                         | 0.84                                       | 1.22                                       | 1.88                                       | 3.02                                       |

<sup>a</sup>  $m$  is molality. Combined expanded uncertainties  $U_c$  are  $U_c(T) = 0.2 \text{ K}$ ,  $U_c(p) = 4 \text{ kPa}$  and  $U_c(m) = 0.002 \text{ mol}\cdot\text{kg}^{-1}$  (level of confidence = 0.95,  $k = 2$ ). Relative standard uncertainty  $u_r$  is  $u_r(\eta) = 0.02$ .

**Table S4.** Correlated results of the VFT equation for binary systems of [TMA][EPPS] (1) + solvents (2) at temperatures  $T = (283.15 \text{ to } 333.15) \text{ K}$  under pressure  $p = 101.3 \text{ kPa}$  <sup>a</sup>

| $m/\text{mol}\cdot\text{kg}^{-1}$ | $\eta_{\infty}/\text{mPa}\cdot\text{s}$ | $B/\text{K}$ | $T_0/\text{K}$ | $10^2\cdot AARD^b$ |
|-----------------------------------|-----------------------------------------|--------------|----------------|--------------------|
| [TMA][EPPS] (1) + water (2)       |                                         |              |                |                    |
| 0.342                             | 0.02758                                 | 588.99       | 141.98         | 0.03               |
| 0.768                             | 0.03693                                 | 572.18       | 150.50         | 0.09               |
| 1.317                             | 0.04433                                 | 600.29       | 154.35         | 0.07               |
| 2.048                             | 0.05260                                 | 639.50       | 159.68         | 0.24               |
| [TMA][EPPS] (1) + methanol (2)    |                                         |              |                |                    |
| 0.342                             | 0.00522                                 | 1615.77      | -27.82         | 0.05               |
| 0.768                             | 0.00893                                 | 1383.61      | 9.50           | 0.09               |
| 1.317                             | 0.01245                                 | 1307.23      | 30.95          | 0.08               |
| 2.048                             | 0.02499                                 | 1037.06      | 80.74          | 0.25               |
| [TMA][EPPS] (1) + ethanol (2)     |                                         |              |                |                    |
| 0.342                             | 0.00174                                 | 2317.86      | -41.93         | 0.23               |
| 0.768                             | 0.00380                                 | 1905.28      | 3.16           | 0.05               |
| 1.317                             | 0.00466                                 | 1886.21      | 18.75          | 0.19               |
| 2.048                             | 0.03529                                 | 981.48       | 112.75         | 0.23               |

<sup>a</sup>  $m$  is molality,  $\eta_{\infty}$ ,  $B$ , and  $T_0$  are the coefficients of eq. 5. Combined expanded uncertainties  $U_c$  are  $U_c(T) = 0.2 \text{ K}$ ,  $U_c(p) = 4 \text{ kPa}$  and  $U_c(m) = 0.002 \text{ mol}\cdot\text{kg}^{-1}$  (level of confidence = 0.95,  $k = 2$ ).

<sup>b</sup>  $AARD = \frac{1}{n} \sum_{i=1}^n \left| \frac{\eta^{\text{calc}} - \eta^{\text{expt}}}{\eta^{\text{expt}}} \right|$ , where  $n$  is the number of data points, and the superscripts of “calc” and “expt” represent calculated and experimental values, respectively.
